# Supplementary material
Source: PubMed Central journal article supplement (PMC8401179)

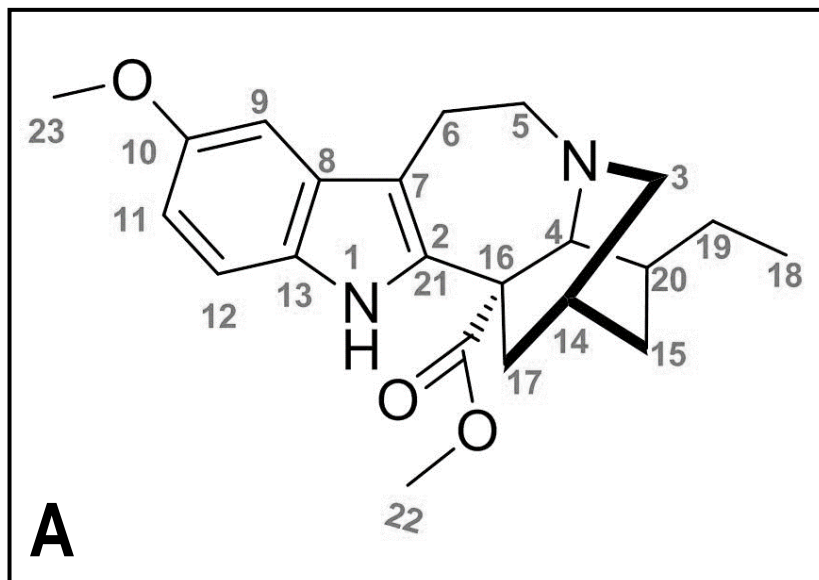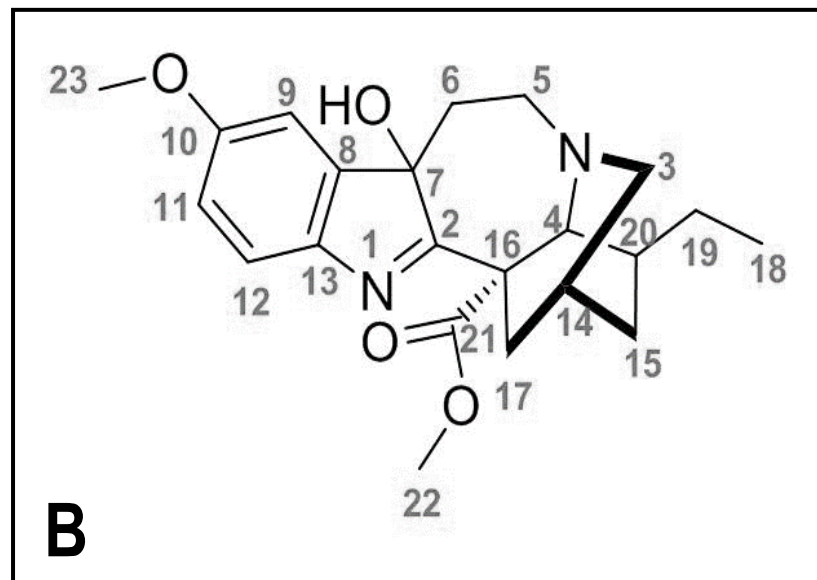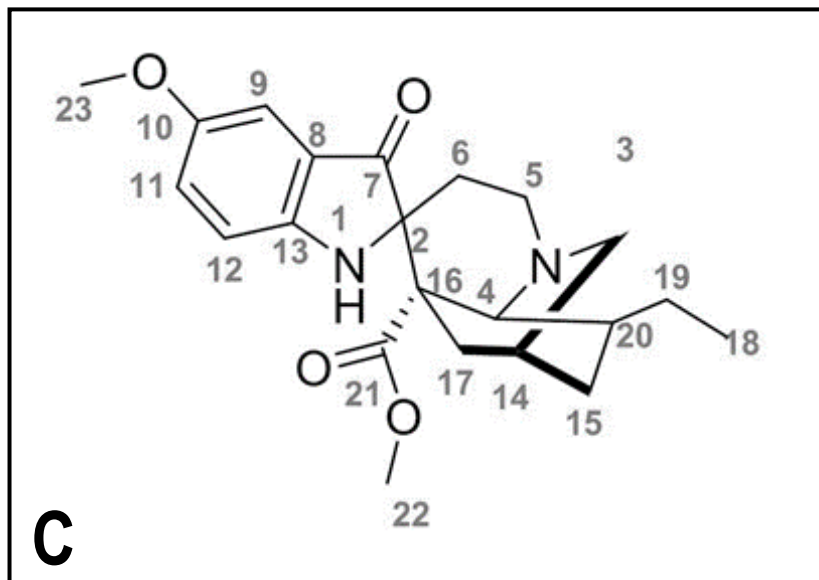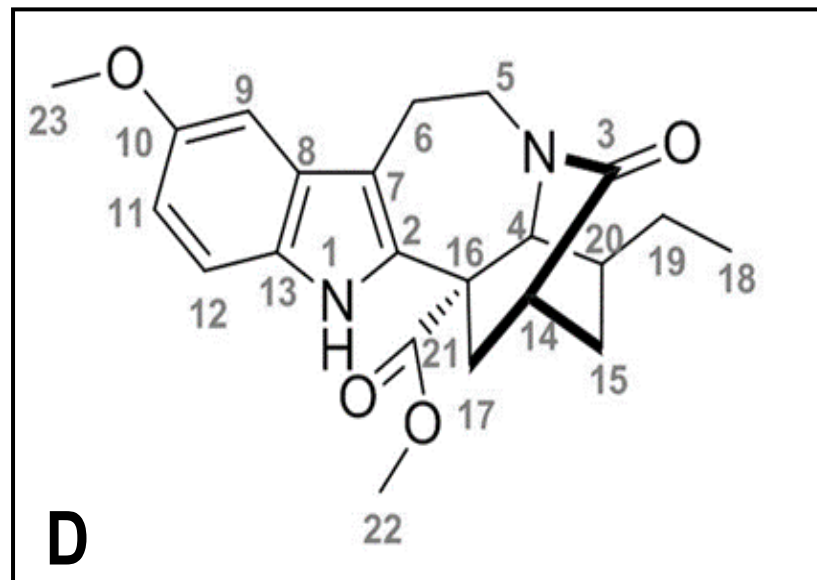

Supplement: 12906_2021_3386_MOESM1_ESM.pdf [file 12906_2021_3386_MOESM1_ESM.pdf]
